# Supplementary material for: Aberrant growth and lethality of Arabidopsis deficient in nonsense-mediated RNA decay factors is caused by autoimmune-like response
Source: PubMed Central journal article supplement — Nucleic Acids Res. 2012 Feb 29;40(12):5615–24. doi: 10.1093/nar/gks195 (PMC3384318; doi:10.1093/nar/gks195), 2012-02-29
Supplement: supp_gks195_nar-00132-c-2012-File008.pdf [file supp_gks195_nar-00132-c-2012-File008.pdf]

## Supplementary Data

**Supplementary Table S1.** *Arabidopsis* mutant lines used in this study

| <b>Mutation</b>        | <b>T-DNA</b> | <b>References</b> |
|------------------------|--------------|-------------------|
| <i>smg7-1</i>          | SALK_073354  | (29)              |
| <i>smg7-2</i>          | SALK_025699  | this study        |
| <i>smg7-3</i>          | SALK_112476  | (29)              |
| <i>smg7-4</i>          | SAIL_63F08   | this study        |
| <i>smg7-5</i>          | SALK_144162  | (29)              |
| <i>smg7-6</i>          | SALK_052532  | this study        |
| <i>upf1-1/lba1</i>     | n.a.         | (28)              |
| <i>upf1-2</i>          | SALK_004606  | (27)              |
| <i>upf1-3</i>          | SALK_081178  | (26) (27)         |
| <i>upf1-4</i>          | SALK_022721  | (26) (27)         |
| <i>upf1-5</i>          | SALK_112922  | (26)              |
| <i>upf3-1</i>          | SALK_025175  | (25) (26)         |
| <i>upf3-2</i>          | SALK_097931  | (26)              |
| <i>pad4-1</i>          | n.a.         | (57)              |
| <i>snc1-11</i>         | SALK_047058  | (40)              |
| <i>ndr1-1/PRI::GUS</i> | n.a.         | (58) (59)         |

## Supplementary Table S2

### List of oligos used in this study

| Name           | Sequence                          | Note                                            |
|----------------|-----------------------------------|-------------------------------------------------|
| PR1-F          | ACAAGATTATCTAAGGGTTCACAA          | Generation of PR1 Northern probe                |
| PR1-R          | TTAGTATGGCTTCTCGTTCACATA          | Generation of PR1 Northern probe                |
| PR5-F          | ATGGCAAATATCTCCAGTATTCACA         | Generation of PR5 Northern probe                |
| PR5-R          | ATGTCGGGGCAAGCCGCGTTGAGG          | Generation of PR5 Northern probe                |
| PDF1.2-F       | ACACAACACATACATCTATACA            | Generation of PDF1.2 Northern probe             |
| PDF1.2-R       | TTAACATGGGACGTAACAGATA            | Generation of PDF1.2 Northern probe             |
| NMD2-F2        | ATGATTCACCTCCATTTGTTG             | RT-PCR of AT2G45670                             |
| NMD2-R         | AAAGCACCGAGTTGGAAGGAA             | RT-PCR of AT2G45670                             |
| Pad4-1-PfIMI-F | ATGAGTCGCATAAGACTAGCCAAG          | Genotyping of pad4-1 mutants, PfIMI digest      |
| Pad4-1-PfIMI-R | CCATTTCTTTCTAAATGAAAATCA          | Genotyping of pad4-1 mutants, PfIMI digest      |
| SNC1F          | CTGGTGCCTGAATGAATTGGTGGA          | Genotyping of snc1-11 mutants                   |
| SNC1R          | GCGATGGTGGAACTGGATAGAGA           | Genotyping of snc1-11 mutants                   |
| NDR-F          | GACGAGATTGCTCATTGCCATTGG          | Genotyping of ndr1-1 mutants                    |
| NDR-R2         | CGAATAGCAAAGAATACGAGTAAA          | Genotyping of ndr1-1 mutant allele              |
| NDR-RW         | AGACGACTCAGTAGGACACACA            | Genotyping of ndr1 wild type allele             |
| lba1-dCAPS-F   | GTTGCCAGTGTTGATTCTTTTCTAG         | Genotyping of lba1/upf1-1 mutants, XbaI digest  |
| lba1-dCAPS-R   | TCCAACATTGATTTTCAGGAGA            | Genotyping of lba1/upf1-1 mutants, XbaI digest  |
| UPF1-2F        | AATATGAAGGGGAGGCTTTGGTG           | Genotyping of upf1-2 mutants                    |
| UPF1-2R        | GCAGAACCACTTTCTACAAGAAGC          | Genotyping of upf1-2 mutants                    |
| UPF1-3F        | GATGAGTCTACTCAAGCAACAG            | Genotyping of upf1-3 mutants                    |
| UPF1-3R        | GAATCTCAAGACTCTCACCTG             | Genotyping of upf1-3 mutants                    |
| upf1-4F        | CGGGTGGATTTGCTGTTGAT              | Genotyping of upf1-4 mutants                    |
| AtUPF1-1R      | CCCATAAGCCAATGATACCAAA            | Genotyping of upf1-4 mutants                    |
| AtUPF1-1F      | ACAATCCAAATCTTCAGTCTCA            | Genotyping of upf1-5 mutants                    |
| AtUPF1-2R      | AGGGACAACAAAATCATGTGC             | Genotyping of upf1-5 mutants                    |
| AtUPF3-4F      | ACTTCTATTGTTGATCTCTGG             | Genotyping of upf3-1 mutants                    |
| AtUPF3-6R      | ATGCTGTTCCGGTTGTGGTGG             | Genotyping of upf3-1/upf3-2 mutants             |
| AtUPF3-1F      | CCTGATTATCTTGAGTTTCTT             | Genotyping of upf3-2 mutants                    |
| Est1b-1        | GACCTTGGTAGCTGGTCTGAG             | Genotyping of smg7-1 mutants                    |
| Est1b-2        | GGACAACAGGCCAACCAATTCAAC          | Genotyping of smg7-1 and smg7-5 mutants         |
| Est1b-7        | GCAAACCCAGATAGGCTACTAGCA          | Genotyping of smg7-2, smg7-3 and smg7-6 mutants |
| Est1b-14       | CGCTTGGACCTACGTTTATTGATG          | Genotyping of smg7-2, smg7-3 and smg7-6 mutants |
| Est1b-15       | GCTGCTTCTCTTGCTAGTAGCCTA          | Genotyping of smg7-4                            |
| Est1b-16       | TGAGTGCCTACGCATGTGTAAACA          | Genotyping of smg7-4                            |
| Est1b-5        | GCCCGTGACAACCTTGATTGTTGCTT        | Genotyping of smg7-5                            |
| LBb1.3         | ATTTTGCCGATTTTCGGAAC              | SALK left border primer                         |
| LBc1           | TGGACCGCTTGCTGCAACTCT             | SALK left border primer                         |
| SAIL-LB3       | TAGCATCTGAATTCATAACCAATCTCGATACAC | SAIL left border primer                         |
| AT4G26410-F    | GAGCTGAAGTGGCTTCCATGAC            | qPCR analysis of At4g26410                      |
| AT4G26410-R    | GGTCCGACATACCCATGATCC             | qPCR analysis of At4g26410                      |
| PR1-qF2        | GCTCTTGTAGGTGCTCTTGTCTTCC         | qPCR analysis of PR1                            |
| PR1-qR2        | AGTCTGCAGTTGCCTCTTAGTTGTTCC       | qPCR analysis of PR1                            |
| NMD2-PTC-qF1   | GTGCATGAAATAAAGAGAAAAGCTTC        | qPCR analysis of At2g45670 -PTC                 |
| NMD2-uni-qR1   | AGGGTAACCAGGGATGAAAGC             | qPCR analysis of At2g45670 -PTC and +PTC        |
| NMD2+PTC-qF1   | AAGGGATGTAAATACAGAGAAAAGCTTC      | qPCR analysis of At2g45670 +PTC                 |

## Supplementary Figure S1

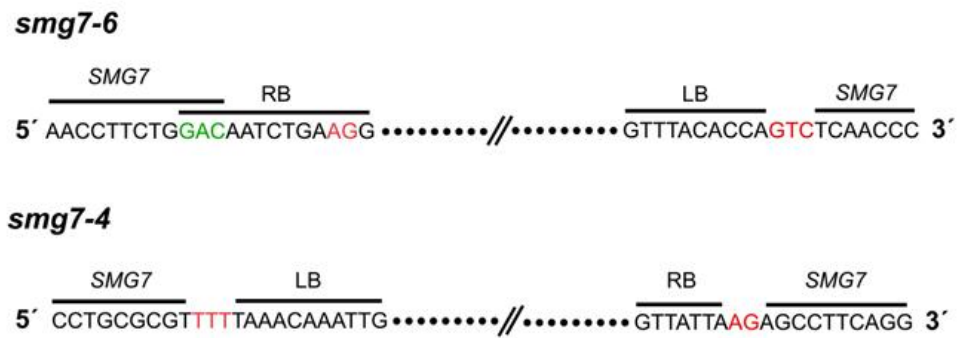

**Supplementary Figure S1.** Structure of T-DNA integration sites in *smg7-6* and *smg7-4* alleles. Sequences derived from the SMG7 gene and from T-DNA borders (LB, RB) are highlighted. Green letters indicate microhomology between SMG7 and T-DNA at the fusion junction; sequences formed *de novo* at the sites of insertions are in red.

Supplementary Figure S2

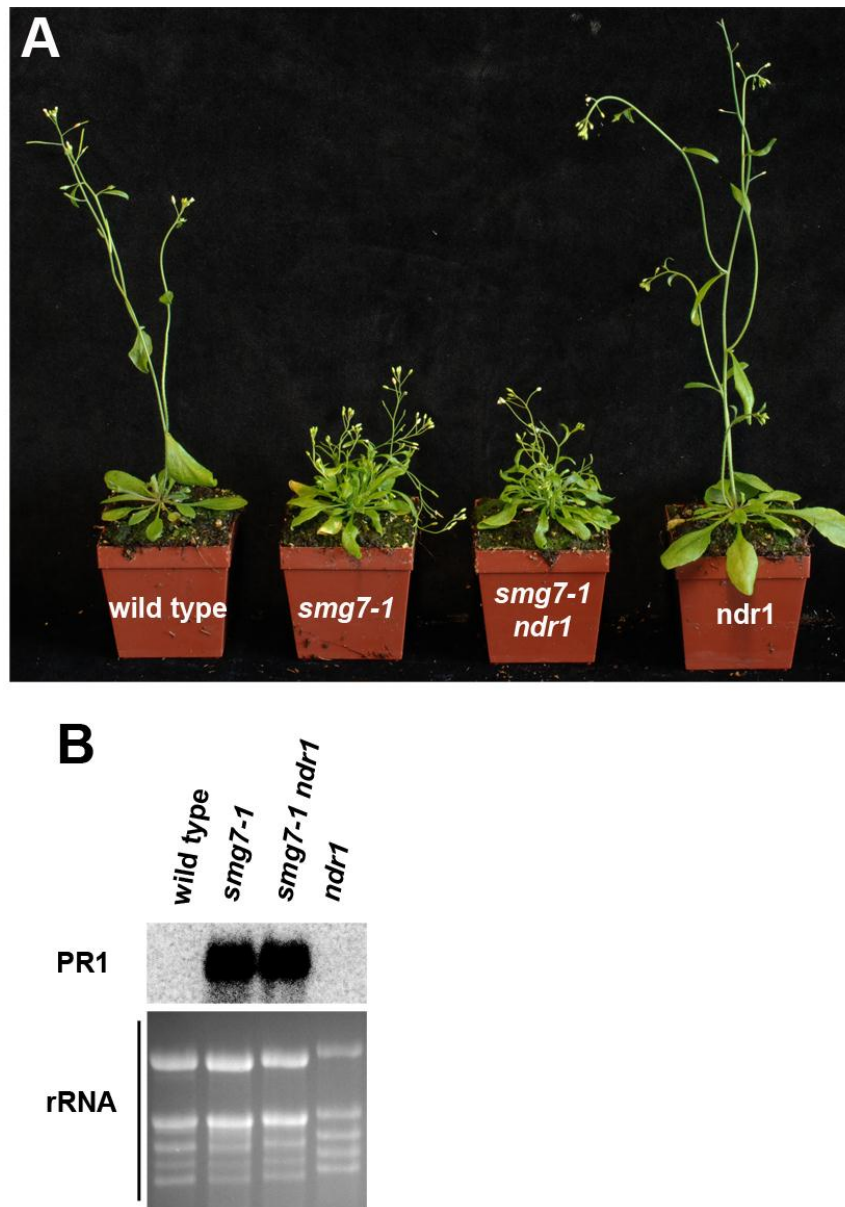

**Supplementary Figure S2.** Inactivation of NDR1 does not rescue growth defects of *smg7-1* mutants. **(A)** Six week old plants carrying different mutant combinations grown at 60% humidity. **(B)** Northern blot analysis of expression of *PR1* in leaves of *smg7-1 ndr1* mutants and control plants. Ethidium bromide stained gel with *rRNA* species is shown as a RNA loading control.

Supplementary Figure S3

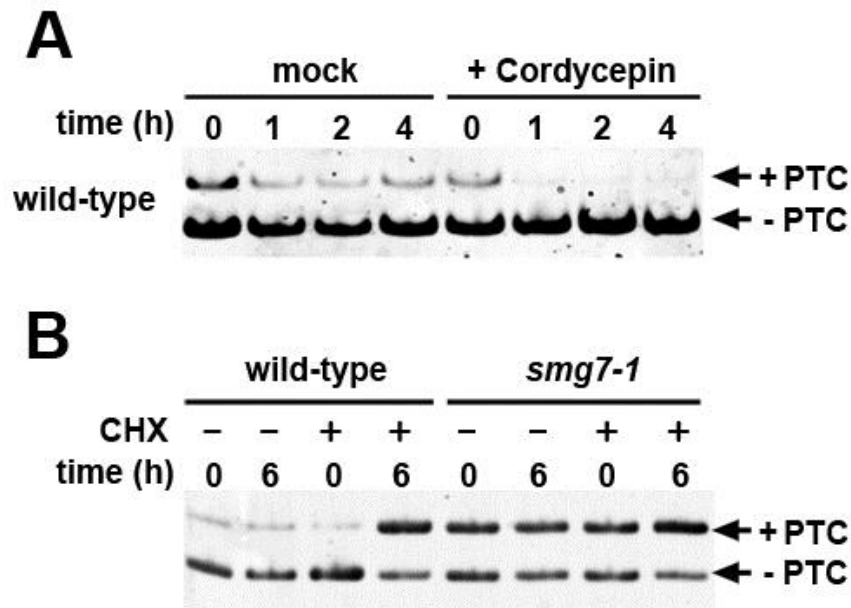

**Supplementary Figure 3.** Alternatively spliced At2g45670 +PTC transcript is NMD target.

**(A)** Stability of the +PTC transcript after inhibition of transcription with cordycepin in leaves of wild type plants. The +PTC transcript disappears within 1hr after cordycepin treatment

**(B)** Effect of cycloheximide (CHX) on relative abundance of the +PTC transcript in wild type and *smg7-1* mutants. CHX treatment increases level of +PTC transcript in wild-type leaves.

## Supplementary Figure S4

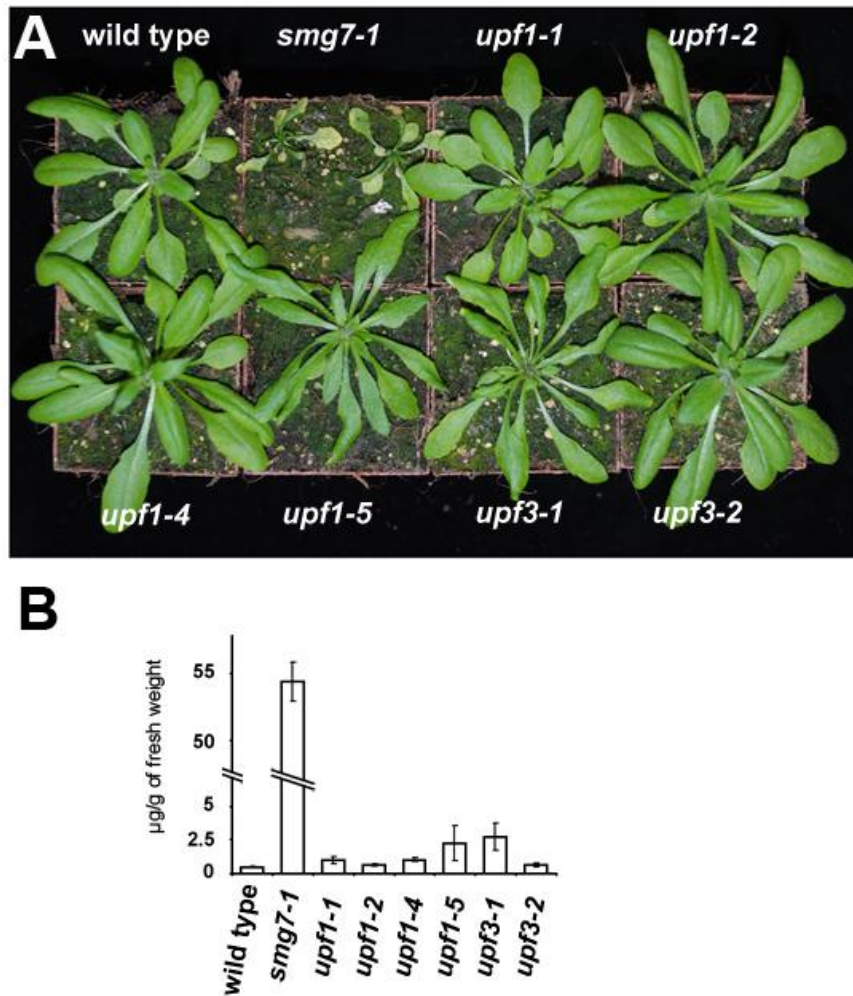

**Supplementary Figure S4.** *upf1-5* and *upf3-1* mutants exhibit subtler growth defects and a milder increase in SA than *smg7-1* plants. **(A)** Four week old NMD mutant plants cultivated at 19°C/16°C and 60-70% humidity. **(B)** Levels of free SA in leaves of NMD mutants. Note that the total level of SA in *smg7-1* mutants grown at 19°/16°C is higher than in the plants grown at 21°C (Figure 3D). This is consistent with improved growth performance of *smg7-1* mutants at higher temperature.

## Supplemental References

57. Glazebrook, J., Zook, M., Mert, F., Kagan, I., Rogers, E.E., Crute, I.R., Holub, E.B., Hammerschmidt, R. and Ausubel, F.M. (1997) Phytoalexin-deficient mutants of Arabidopsis reveal that PAD4 encodes a regulatory factor and that four PAD genes contribute to downy mildew resistance. *Genetics*, **146**, 381-392.
58. Century, K.S., Shapiro, A.D., Repetti, P.P., Dahlbeck, D., Holub, E. and Staskawicz, B.J. (1997) NDR1, a pathogen-induced component required for Arabidopsis disease resistance. *Science*, **278**, 1963-1965.
59. Shapiro, A.D. and Zhang, C. (2001) The role of NDR1 in avirulence gene-directed signaling and control of programmed cell death in Arabidopsis. *Plant Physiol*, **127**, 1089-1101.
